# Supplementary material for: Genomewide Association Analyses of Lactation Persistency and Milk Production Traits in Holstein Cattle Based on Imputed Whole-Genome Sequence Data
Source: MDPI journal article supplement (doi:10.3390/genes12111830), 2021-11-19
Supplement: s1 [file s1]

**(a) MILK**

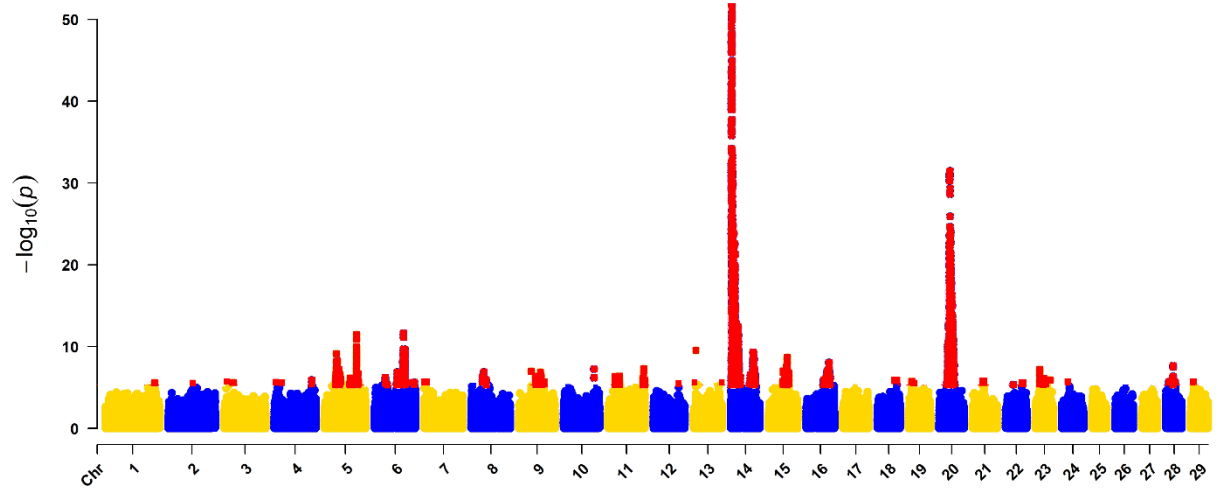

**(b) FAT**

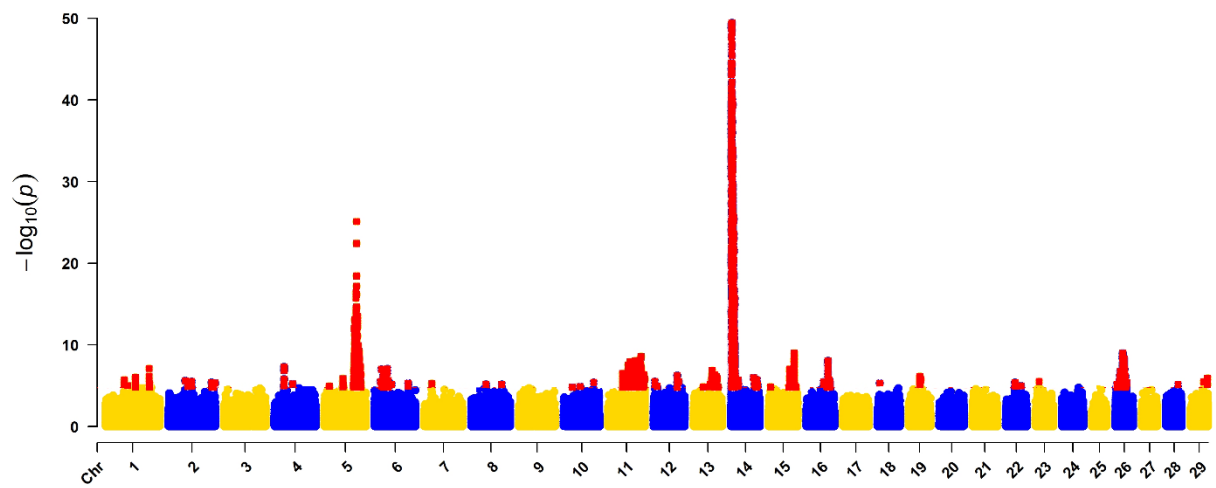

**(c) FAT%**

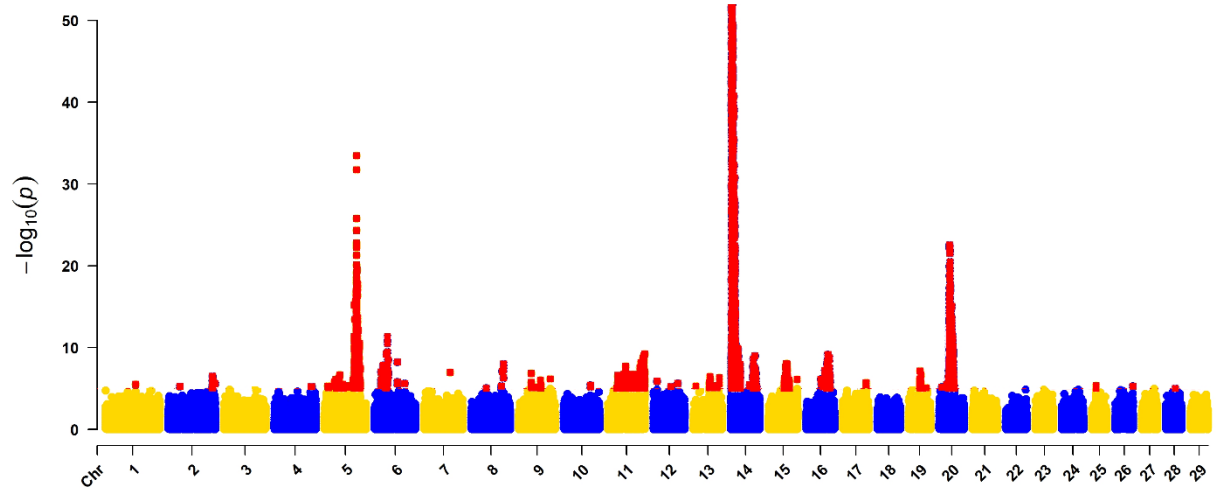

(d) PROT

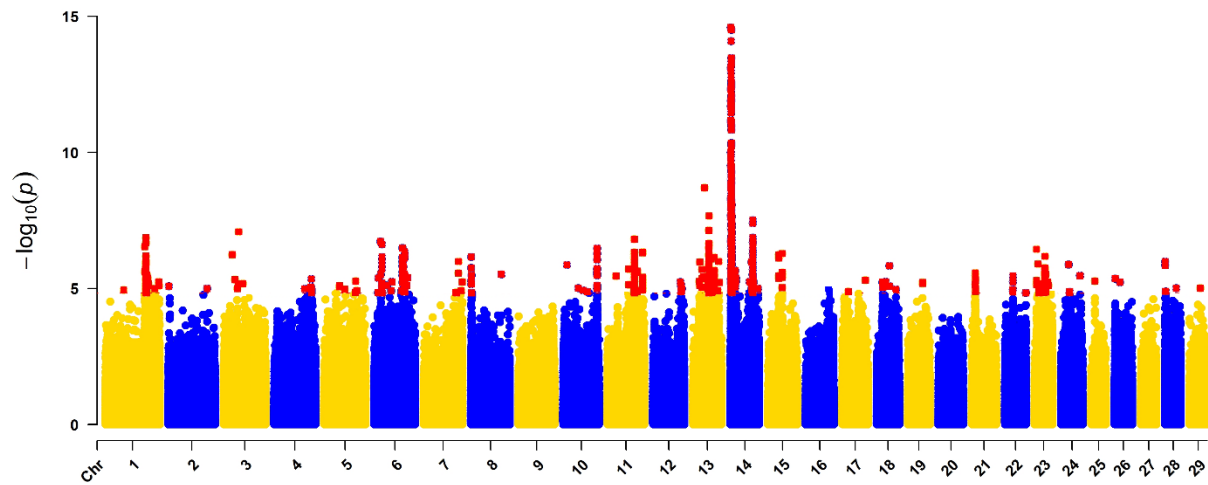

(e) PROT%

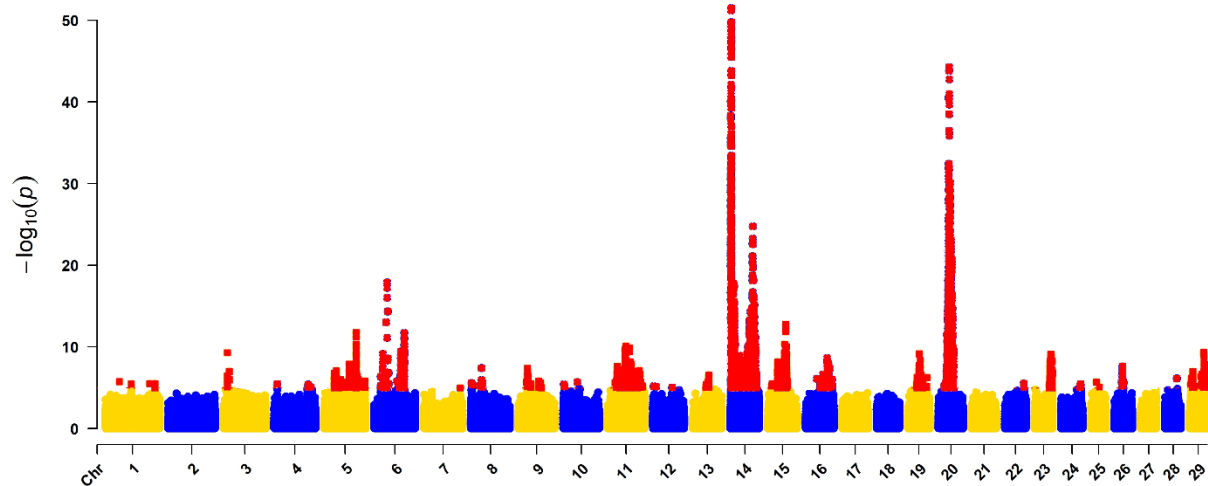

**Supplementary File S1.** Manhattan plots with truncated Y-axis for the GWAS results for milk yield (MILK), fat yield (FAT), fat percentage (FAT%), protein yield (PROT) and protein percentage (PROT%) based on imputed whole-genome sequence data. Statistically significant SNP are represented by red dots.
